# Supplementary material
Source: publisher figshare collection journal article supplement (https://sage.figshare.com/ndownloader/files/40384692)
Supplement: Supplementary file 1 [file 40384692]

**Supplemental Table 2. Regression results predicting the effect of single healthy caregiver behavior on the likelihood of patient-centered medical home use stratified by age groups (NSCH 2016-2017, weighted)**

| Variable                               | 0-5 years old<br>(Unweighted N=17,234)<br>Marginal Effects (95% CI) | 6-17 years old<br>(Unweighted N=38,723)<br>Marginal Effects (95% CI) |
|----------------------------------------|---------------------------------------------------------------------|----------------------------------------------------------------------|
| Healthy Caregiver Behavior Items       |                                                                     |                                                                      |
| Smokes inside the house                | 0.011 (-0.129, 0.151)                                               | 0.004 (-0.063, 0.071)                                                |
| Shares Family Meals                    | -0.005 (-0.050, 0.039)                                              | 0.009 (-0.018, 0.036)                                                |
| Monitors TV time                       | 0.046 (0.011, 0.082)*                                               | 0.057 (0.033, 0.081)***                                              |
| Breast feeding                         | 0.052 (0.002, 0.101)*                                               | N/A                                                                  |
| Reads/Sings to                         | 0.023 (-0.012, 0.057)                                               | N/A                                                                  |
| Shares Ideas with Children             | N/A                                                                 | 0.101 (0.074, 0.128)***                                              |
| Ensures Child Always Finishes Homework | N/A                                                                 | 0.048 (0.021, 0.075)***                                              |
| Child's Race/Ethnicity                 |                                                                     |                                                                      |
| White                                  | Ref                                                                 | Ref                                                                  |
| Black                                  | -0.101 (-0.171, -0.031)**                                           | -0.098 (-0.139, -0.058)***                                           |
| Hispanic                               | -0.132 (-0.187, -0.078)***                                          | -0.062 (-0.101, -0.024)**                                            |
| Other                                  | -0.095 (-0.143, -0.046)***                                          | -0.041 (-0.076, -0.007)*                                             |
| Caregiver's Age                        |                                                                     |                                                                      |
| <=30                                   | Ref                                                                 | Ref                                                                  |
| 31-40                                  | 0.003 (-0.040, 0.047)                                               | 0.073 (0.004, 0.142)*                                                |
| 41-50                                  | 0.007 (-0.051, 0.065)                                               | 0.102 (0.033, 0.171)**                                               |
| 51+                                    | 0.017 (-0.067, 0.100)                                               | 0.159 (0.087, 0.230)***                                              |
| Caregiver's Health Status              |                                                                     |                                                                      |
| Good or below                          | Ref                                                                 | Ref                                                                  |
| Very good or Excellent                 | 0.004 (-0.041, 0.049)                                               | 0.006 (-0.024, 0.036)                                                |
| Caregiver's Mental Health Status       |                                                                     |                                                                      |
| Good or below                          | Ref                                                                 | Ref                                                                  |
| Very good or Excellent                 | 0.040 (-0.008, 0.088)                                               | 0.054 (0.022, 0.086)**                                               |
| Child's Insurance                      |                                                                     |                                                                      |
| Any Public                             | Ref                                                                 | Ref                                                                  |
| Private Only                           | 0.071 (0.025, 0.118)**                                              | 0.066 (0.031, 0.101)***                                              |
| Uninsured                              | -0.150 (-0.253, -0.046)**                                           | -0.130 (-0.201, -0.059)***                                           |
| Highest Education in Household         |                                                                     |                                                                      |
| High School or Less                    | Ref                                                                 | Ref                                                                  |
| More than High School                  | 0.119 (0.062, 0.176)***                                             | 0.098 (0.063, 0.133)***                                              |
| Primary Language                       |                                                                     |                                                                      |
| Non-English                            | Ref                                                                 | Ref                                                                  |
| English                                | 0.107 (0.039, 0.176)**                                              | 0.068 (0.006, 0.130)*                                                |
| Family Structure                       |                                                                     |                                                                      |
| Other                                  | Ref                                                                 | Ref                                                                  |
| Two-Parent                             | 0.032 (-0.027, 0.090)                                               | 0.025 (-0.005, 0.056)                                                |

**Supplemental Table 2. Regression results predicting the effect of single healthy caregiver behavior on the likelihood of patient-centered medical home use stratified by age groups (NSCH 2016-2017, weighted)**

| Variable                      | 0-5 years old<br>(Unweighted N=17,234)<br>Marginal Effects (95% CI) | 6-17 years old<br>(Unweighted N=38,723)<br>Marginal Effects (95% CI) |
|-------------------------------|---------------------------------------------------------------------|----------------------------------------------------------------------|
| Number of Children            |                                                                     |                                                                      |
| One                           | Ref                                                                 | Ref                                                                  |
| More than one                 | 0.003 (-0.031, 0.038)                                               | 0.003 (-0.025, 0.030)                                                |
| Moving home                   |                                                                     |                                                                      |
| No                            | Ref                                                                 | Ref                                                                  |
| 1-3 times                     | -0.017 (-0.052, 0.017)                                              | -0.034 (-0.063, -0.006)*                                             |
| More than 3 times             | -0.117 (-0.212, -0.022)*                                            | -0.076 (-0.113, -0.040)***                                           |
| Rundown Housing               |                                                                     |                                                                      |
| No                            | Ref                                                                 | Ref                                                                  |
| Yes                           | -0.008 (-0.059, 0.044)                                              | -0.011 (-0.056, 0.033)                                               |
| Feel Safe in the neighborhood |                                                                     |                                                                      |
| No                            | Ref                                                                 | Ref                                                                  |
| Yes                           | -0.010 (-0.106, 0.086)                                              | 0.042 (-0.023, 0.106)                                                |
| Under 100% Poverty            |                                                                     |                                                                      |
| No                            | Ref                                                                 | Ref                                                                  |
| Yes                           | -0.026 (-0.084, 0.033)                                              | 0.005 (-0.039, 0.049)                                                |
| Child's Gender                |                                                                     |                                                                      |
| Female                        | Ref                                                                 | Ref                                                                  |
| Male                          | -0.012 (-0.045, 0.021)                                              | 0.022 (-0.002, 0.046)                                                |
| Child's Age                   |                                                                     |                                                                      |
| 0-5 years                     | N/A                                                                 | N/A                                                                  |
| 6-11 years                    | N/A                                                                 | Ref                                                                  |
| 12-17 years                   | N/A                                                                 | 0.014 (-0.012, 0.040)                                                |
| Child's Health Status         |                                                                     |                                                                      |
| Good or below                 | Ref                                                                 | Ref                                                                  |
| Very good or Excellent        | 0.204 (0.133, 0.276)                                                | 0.121 (0.078, 0.164)                                                 |
| Special Health Care Needs     |                                                                     |                                                                      |
| No                            | Ref                                                                 | Ref                                                                  |
| Yes                           | -0.033 (-0.084, 0.019)                                              | -0.012 (-0.038, 0.014)                                               |

1Also controlled for state fixed effects.

2 \*\*\*: <.001; \*\*: <.01; \*: <.05

3Regression controlled for survey weights in order to obtain estimations for nationally representative populations of children aged 0–17 years within each state. For detailed methodology of NSCH sample design, refer to:

<https://www.census.gov/programs-surveys/nsch/technical-documentation/methodology.html>
